# Supplementary material
Source: PubMed Central journal article supplement (PMC7757019)
Supplement: NIHMS1592766-supplement-1.pdf [file NIHMS1592766-supplement-1.pdf]

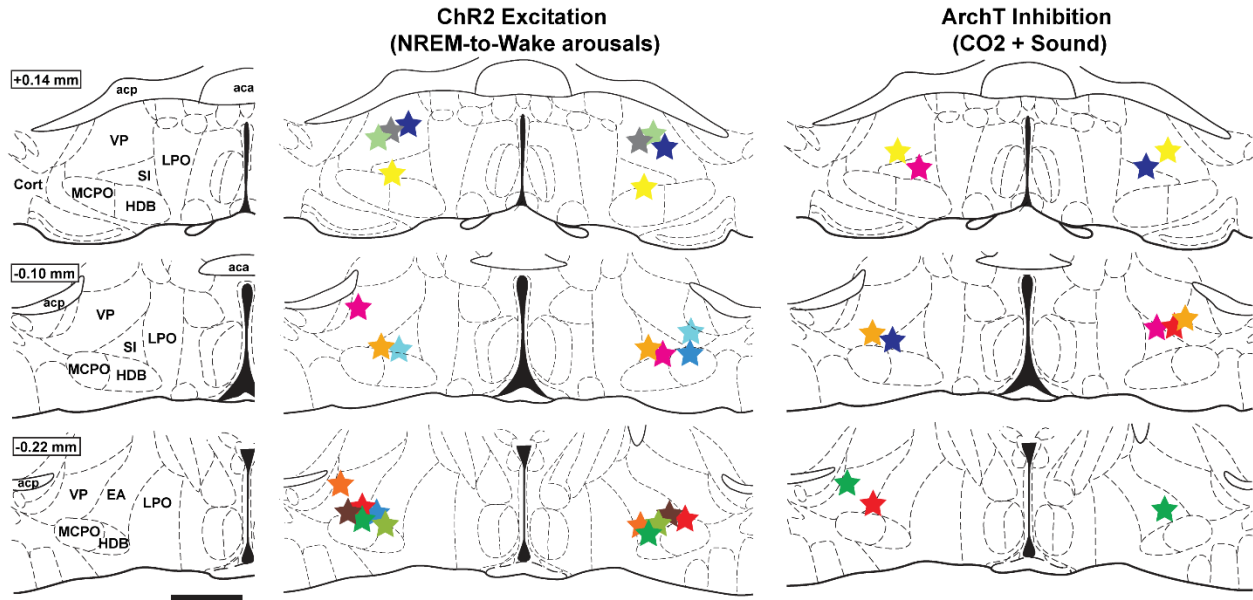

**Figure S1. Summary of location of the histologically confirmed optical fiber tips. Related to Figures 2C & 3C.** The ventral tips of the fiber optic cannula, which are presumably the dorsal-most tips of the area of optogenetic stimulation, were located within BF. Localization of bilateral optogenetic fiber stimulation sites in BF for channelrhodopsin2 (ChR2) excitation (N=13) and archaerhodopsin subtype TP003 (ArchT) experiments (N=6). Color coding indicates each individual case. Scale bar = 1 mm. Abbreviations: aca, anterior aspect of the anterior commissure; acp, posterior aspect of the anterior commissure; BF, basal forebrain; Cort, cortex; EA, extended amygdala; HDB, horizontal limb of the diagonal band; LPO, lateral preoptic nucleus; MCPO, magnocellular preoptic nucleus; SI, substantia innominata; VP, ventral pallidum. Atlas templates schematics adapted from Franklin and Paxinos [S1].

### Supplemental Reference

S1. Franklin, K.B.J., and Paxinos, G. (2008). The mouse brain in stereotaxic coordinates, (Amsterdam: Elsevier Academic Press).
